# Supplementary material for: Guidelines for diagnosis and treatment in neurology – Lyme neuroborreliosis
Source: PubMed Central journal article supplement (PMC7174852; doi:10.3205/000279), 2020-02-27
Supplement: GMS-18-03-s-004.pdf [file GMS-18-03-s-004.pdf]

## Attachment 4: Conflict of interest

Guideline: Neuroborreliosis

Guideline coordinators: Sebastian Rauer and Stefan Kastenbauer

AWMF register no.: 030/071

Date: September 2017

The original, fully completed declaration of interest forms are filed with the guideline coordinator/Guideline Editorial Office (EO). For reasons of transparency, all potential interests, even if they are not connected to the topic of the guideline, must be indicated. Members are listed in alphabetical order.

|                        | Advisory or expert activities | Member of a scientific advisory board | Lecturing and training activities | Authorship/co-authorship | Research projects/clinical studies | Ownership interests in healthcare sector | Membership/role in interest groups                       | Focus of scientific or clinical activities, publications | Key involvement in education and training institutes | Personal ties * | Employer                                                       | Assessment in relation to the guideline topic, regulatory measures if necessary    |
|------------------------|-------------------------------|---------------------------------------|-----------------------------------|--------------------------|------------------------------------|------------------------------------------|----------------------------------------------------------|----------------------------------------------------------|------------------------------------------------------|-----------------|----------------------------------------------------------------|------------------------------------------------------------------------------------|
| <b>Karl Bechter</b>    | no                            | German Borreliosis Society            | no                                | no                       | no                                 | no                                       | Member of various scientific societies (including DGPPN) |                                                          |                                                      | no              | Retired (Günzburg Regional Hospital)                           | No conflicts of interest                                                           |
| <b>Walter Berghoff</b> | no                            | no                                    | no                                | no                       | no                                 | no                                       | no                                                       | no                                                       | no                                                   | no              | Medical practitioner in private practice                       | No declaration of income for known topic-related expert activities despite request |
| <b>Ursula Dahlem</b>   | no                            | no                                    | no                                | no                       | no                                 | no                                       | OnLyme-Aktion.org (member, chair)                        | no                                                       | no                                                   | no              | OnLyme-Aktion.org, action alliance against tick-borne diseases | No conflicts of interest                                                           |

|                        |                                                                               |                    |                                                |                                                   |                     |                           |                                                                                                                                                                    |                                                                                                                                                                                                        |                                                                                                        |    |                                                                                                           |                                                                                                                          |
|------------------------|-------------------------------------------------------------------------------|--------------------|------------------------------------------------|---------------------------------------------------|---------------------|---------------------------|--------------------------------------------------------------------------------------------------------------------------------------------------------------------|--------------------------------------------------------------------------------------------------------------------------------------------------------------------------------------------------------|--------------------------------------------------------------------------------------------------------|----|-----------------------------------------------------------------------------------------------------------|--------------------------------------------------------------------------------------------------------------------------|
| <b>Rick Dersch</b>     | no                                                                            | no                 | no                                             | no                                                | Cochrane<br>Germany | no                        | DGN (member),<br>DGLN                                                                                                                                              | Neuroinfectology,<br>neuroimmunology,<br>neurological<br>emergency and<br>intensive care, CSF<br>diagnostic testing;<br>publications on<br>treatment and<br>disease progression<br>of neuroborreliosis | no                                                                                                     | no | University<br>Hospital<br>Freiburg                                                                        | No conflicts of<br>interest                                                                                              |
| <b>Volker Fingerle</b> |                                                                               | no                 |                                                |                                                   |                     | no                        |                                                                                                                                                                    | Epidemiology,<br>diagnostic testing<br>borreliosis; advising<br>patients/colleagues                                                                                                                    |                                                                                                        | no | Bayerisches<br>LGL                                                                                        | Limited conflicts<br>at most (fees),<br>independence<br>remains<br>unaffected even<br>as member of the<br>steering group |
| <b>Ute Fischer</b>     | Borreliosis<br>patients,<br>Borreliosis and<br>FSME<br>Association<br>Germany | no                 | Borreliosis and<br>FSME Association<br>Germany | Borreliosis<br>and FSME<br>Association<br>Germany | no                  | Of the<br>written<br>word | Borreliosis and<br>FSME Association<br>Germany,<br>German<br>Borreliosis<br>Society, German<br>Federation of<br>Journalists,<br>Correktiv<br>Abgeordneten<br>Watch | None                                                                                                                                                                                                   | Seminars for<br>borreliosis<br>consultants at<br>the Borreliosis<br>and FSME<br>Association<br>Germany | no | Borreliosis and<br>FSME<br>Association<br>Germany,<br>patient-<br>organisation,<br>federal<br>association | Does not explain<br>the exact extent<br>of direct financial<br>interests, for<br>example income<br>from publications     |
| <b>Michael Freitag</b> | no                                                                            | DAK-<br>Gesundheit | no                                             | no                                                | no                  | no                        | Member of<br>DEGAM, member<br>of the standing<br>guideline<br>committee                                                                                            | Borreliosis, diabetes,<br>nursing home<br>residents; general<br>medicine/primary<br>care                                                                                                               | no                                                                                                     | no | Carl von<br>Ossietzky<br>University<br>Oldenburg                                                          | No conflicts of<br>interest                                                                                              |

|                      |    |                         |                                                     |    |          |    |                                                                                                                                                                                                                                                                                                                                                                       |                                                                                                                                                                                           |                                                                                                                                                |    |                                                                                          |                                                                                             |
|----------------------|----|-------------------------|-----------------------------------------------------|----|----------|----|-----------------------------------------------------------------------------------------------------------------------------------------------------------------------------------------------------------------------------------------------------------------------------------------------------------------------------------------------------------------------|-------------------------------------------------------------------------------------------------------------------------------------------------------------------------------------------|------------------------------------------------------------------------------------------------------------------------------------------------|----|------------------------------------------------------------------------------------------|---------------------------------------------------------------------------------------------|
| <b>Gudrun Gossau</b> | no | no                      | Astellas, Allergan, Grünenthal, ATI, Genzyme, Lilly | no | Allergan | no | DGSS, DMKG, DGN, IHS                                                                                                                                                                                                                                                                                                                                                  | Pain therapy, chronic pain, smell and pain, headaches, neuropathic pain, chronic pain, headaches in children                                                                              | DMKG, regional representative, training courses: headaches, neuropathic pain, instruction at TU Dresden: lectures Q14 pain medicine, headaches | no | University Hospital Dresden, Inter-disciplinary Pain Centre                              | Limited, topic-related interests at most, however not critical in relation to the guideline |
| <b>Gerd Gross</b>    | no | Sanofi, Pasteur MSD GSK |                                                     | no | no       | no | German Dermatology Society (DDG), Working Group for Dermatological Infectology (ADI) German Society for Allergology and Clinical immunology (DGAKI) German Society of Infectious Diseases Working Group for Dermatological Histology (ADH) European Academy of Dermatology and Venereology (EADV) International Union against Sexually Transmitted Infections (IUSTI) | HPV infections, HPV-assoc. lesions (preneop, invasive Tks), sex. transmitted infections; changes to skin and mucous membrane, ges. dermatology and venerology (incl. Borrelia infections) | no                                                                                                                                             | no | Emeritus, (State of Mecklenburg Western-Pomerania University Dermatology Clinic Rostock) | No conflicts of interest                                                                    |

|                                            |                                                                           |                            |                                                                                                  |         |                                 |    |                                                                                                                                             |                                                                                                                          |                                                                                          |    |                                                                                                                           |                                                                                                          |
|--------------------------------------------|---------------------------------------------------------------------------|----------------------------|--------------------------------------------------------------------------------------------------|---------|---------------------------------|----|---------------------------------------------------------------------------------------------------------------------------------------------|--------------------------------------------------------------------------------------------------------------------------|------------------------------------------------------------------------------------------|----|---------------------------------------------------------------------------------------------------------------------------|----------------------------------------------------------------------------------------------------------|
| <b>Heidelore Hofmann</b>                   | Arbitration board for medical liability issues, professional associations | no                         | Scientific conventions, training courses for the state medical associations, medical conferences | Various | Viramed Co.                     | no | no                                                                                                                                          | Lyme borreliosis; infectious diseases                                                                                    | no                                                                                       | no | Clinic and Polyclinic of Dermatology and Allergology, University Hospital Rechts der Isar, Technical University of Munich | No conflicts of interest                                                                                 |
| <b>Klaus-Peter Hunfeld</b>                 | no                                                                        | no                         | Siemens, Roche                                                                                   | no      | no                              | no | DGHM, BÄMI, INSTAND, DGKL, PEG, IGLD                                                                                                        | Medical microbiology, Lyme borreliosis, molecular detection methods, sepsis, laboratory medicine, medicine, microbiology | no                                                                                       | no | Krankenhaus Nordwest GmbH Frankfurt/Main                                                                                  | Limited topic-related interest, expertise in laboratory diagnostic testing outweighs potential interests |
| <b>Hans-Iko Huppertz</b>                   | no                                                                        | Novartis                   | Pfizer                                                                                           | no      | Novartis, Pfizer, Roche, Abbvie | no | Chairman of the Society of Paediatrics and Adolescent Medicine for Northern Germany, German Academy for Paediatrics and Adolescent Medicine | Paediatric rheumatology and infectology; paediatrics and adolescent medicine                                             | no                                                                                       | no | Gesundheit Nord Klinikum Bremen-Mitte                                                                                     | No conflicts of interest                                                                                 |
| <b>Reinhard Kaiser</b>                     | LG, SG, Arbitration board for medical liability issues                    | DGN GL on neuroborreliosis | DGN annual conference                                                                            | no      | no                              | no | DGN (member)                                                                                                                                | FSME; general neurology                                                                                                  | Instruction of students as part of the teaching hospital at the University of Heidelberg | no | Helios Clinic Pforzheim                                                                                                   | No conflicts of interest                                                                                 |
| <b>Stefan Kastenbauer (co-coordinator)</b> | no                                                                        | no                         | no                                                                                               | no      | no                              | no | DGN, BVDN                                                                                                                                   | Neuroinfectology, general neurology in practice                                                                          | no                                                                                       | no | Private practice, self-employed                                                                                           | No conflicts of interest                                                                                 |

|                                      |                                                             |                                                      |                                                                                                                                                                                                                                                                                                                                                                                                                    |                   |                                                                                                 |    |                                                                                                                                                                                                                                                                                                                                                                                                                                                                                                                                                                                            |                                                       |                                                                                                                                                                                                         |    |                                                                         |                          |
|--------------------------------------|-------------------------------------------------------------|------------------------------------------------------|--------------------------------------------------------------------------------------------------------------------------------------------------------------------------------------------------------------------------------------------------------------------------------------------------------------------------------------------------------------------------------------------------------------------|-------------------|-------------------------------------------------------------------------------------------------|----|--------------------------------------------------------------------------------------------------------------------------------------------------------------------------------------------------------------------------------------------------------------------------------------------------------------------------------------------------------------------------------------------------------------------------------------------------------------------------------------------------------------------------------------------------------------------------------------------|-------------------------------------------------------|---------------------------------------------------------------------------------------------------------------------------------------------------------------------------------------------------------|----|-------------------------------------------------------------------------|--------------------------|
| <b>Wolfgang Kölmel</b>               | Guideline group, courts                                     | DMSG                                                 | Lectures at DGN                                                                                                                                                                                                                                                                                                                                                                                                    | no                | no                                                                                              | no | DMSG, DGN                                                                                                                                                                                                                                                                                                                                                                                                                                                                                                                                                                                  | Inflammatory diseases of the CNS, neuro-ophthalmology | Fresenius Institute for speech therapy                                                                                                                                                                  | no | Private practice                                                        | No conflicts of interest |
| <b>Ina B. Kopp, AWMF (moderator)</b> | German Accreditation Body (DAkKS), Ludwig Boltzmann Society | AQUA Institute, Agency for Quality in Medicine (ÄZQ) | German Veterinary Medical Society (DVG), German Association of Oral Implantology (DGI), Austrian Society of Dermatology and Venereology (ÖGDV), German Society of Internal Medicine (DGIM), Hessen State Chamber of Physicians (LÄK Hessen), German Association of Senior Hospital Physicians (VLK), Stiftung Gesundheitswissen Hessen State Chamber of Physicians (LÄK Hessen), Academy of Public Health Services | Schattauer Verlag | German Cancer Aid (DKH), Agency for Quality in Medicine (ÄZQ), German Research Foundation (DFG) | no | Expanded planning group for the National Health Care Guidelines Programme of the German Medical Association, National Association of Statutory Health Insurance Physicians and AWMF (member), steering committee for the Oncology Guidelines Programme of the German Cancer Society, German Cancer Aid and AWMF (member), steering committee of the Cooperative Network for Quality Assurance through Clinical Cancer Registries (member), standing committee for AWMF guidelines (deputy chair), Guidelines International Network, German Network for Evidence-Based Medicine, scientific | no                                                    | Seminars on AWMF guidelines for guideline developers and curriculum guideline consultants, advanced courses on AWMF guidelines for guideline consultants, workshop for the oncology guideline programme | no | Working group of the Association of Scientific Medical Societies (AWMF) | No conflicts of interest |

|                       |                                                                |                                                                |                                                                                             |                                                                  |                                                                                  |    |                                                                                                                                                                                                                                                                                                                                                                                   |                                                                                                |    |    |                                  |                                                                                                                                                       |
|-----------------------|----------------------------------------------------------------|----------------------------------------------------------------|---------------------------------------------------------------------------------------------|------------------------------------------------------------------|----------------------------------------------------------------------------------|----|-----------------------------------------------------------------------------------------------------------------------------------------------------------------------------------------------------------------------------------------------------------------------------------------------------------------------------------------------------------------------------------|------------------------------------------------------------------------------------------------|----|----|----------------------------------|-------------------------------------------------------------------------------------------------------------------------------------------------------|
|                       |                                                                |                                                                |                                                                                             |                                                                  |                                                                                  |    | advisory board for Cross-sectoral Quality in Health Care (SQG) of the AQUA Institute (member), advisory board for the National Health Care Guidelines Programme of the German Medical Association, National Association of Statutory Health Insurance Physicians and AWMF (member), Advisory board for the Institute for Quality Assurance and Transparency in Healthcare (IQTIG) |                                                                                                |    |    |                                  |                                                                                                                                                       |
| <b>Andreas Krause</b> | Abbvie, Celgene, Janssen, MSD, Novartis, Pfizer, Roche, Sanofi | Abbvie, Celgene, Janssen, MSD, Novartis, Pfizer, Roche, Sanofi | Abbvie, BMS, Celgene, Janssen, Medac, MSD, Med update, Novartis, Pfizer, Roche, Sanofi, UCB | Roche, Journal Arthritis+ Rheuma, Journal Aktuelle Rheumatologie | Abbvie, Amgen, BMS, Celtrion, GSK, Janssen, MSD, Novartis, Pfizer, Roche, Sandoz | no | Advisory board of the German Society for Rheumatology, Association of Rheumatological Acute Hospitals, Professional Association of German Rheumatologists, German Society for Internal Medicine, German Rheumatism League, German Association Morbus Bechterew                                                                                                                    | Rheumatoid arthritis, Spondyloarthritis, pulmonary involvement, infection-associated arthritis | no | no | Immanuel Krankenhaus Berlin GmbH | Numerous potential interests with regard to antibiotic therapies; no voting on issues relating to pharmacological, particularly, antibiotic treatment |

|                                      |                        |                           |                                                                                                           |                                   |                                                  |                                                             |                                                                                       |                                                                                                                                    |    |    |                                                                                                                            |                                             |
|--------------------------------------|------------------------|---------------------------|-----------------------------------------------------------------------------------------------------------|-----------------------------------|--------------------------------------------------|-------------------------------------------------------------|---------------------------------------------------------------------------------------|------------------------------------------------------------------------------------------------------------------------------------|----|----|----------------------------------------------------------------------------------------------------------------------------|---------------------------------------------|
| <b>Rainer Müller</b>                 | no                     | no                        | no                                                                                                        | no                                | no                                               | no                                                          | ART commission at RKI, German Society of Oto-Rhino-Laryngology, Head and Neck Surgery | Laryngology, phoniatory                                                                                                            | no | no | Med. Faculty of TU Dresden                                                                                                 | No conflicts of interest                    |
| <b>Matthias Pauschinger</b>          | no                     | no                        | no                                                                                                        | no                                | no                                               | no                                                          | no                                                                                    | no                                                                                                                                 | no | no | Nuremberg Hospital, Medical Clinic 8 – Cardiology Department, University Hospital of Paracelsus Medical Private University | No conflicts of interest                    |
| <b>Hans-Walter Pfister</b>           | no                     | no                        | no                                                                                                        | no                                | no                                               | no                                                          | DGN, DGNI, PEG                                                                        | Inflammatory CNS diseases; intensive care medicine                                                                                 | no | no | LMU University Clinic Grosshadern, Department of Neurology                                                                 | No conflicts of interest                    |
| <b>Sebastian Rauer (coordinator)</b> | LG, SG, BG, insurances | Genzyme, Biogen, Novartis | Biogen GmbH, Sanofi Genzyme, Merck Senoro, Novartis, MK+S, Teva, Diverse clinics/institutes (no industry) | Thieme Verlag: Neurologie Compact | Biogen GmbH, Novartis, Teva, Roche, Genzyme, DGN | 50% ownership of the company ravo Diagnostika Freiburg GmbH | Member of the DGN, member of the DGLN                                                 | Neuroimmunology, neuroinfectiology (neuroborreliosis, multiple sclerosis, paraneoplastic neurological syndrome, neuroinfectiology) | no | no | Freiburg University Hospital – Department of Neurology                                                                     | No voting mandate due to specific interests |

|                              |                                         |             |                                                                                                                                                                                                                                                                  |                                                                                                                                           |                                                                                                                                                                      |    |                                                                                                                                                                                                    |                                                                                                                                                                                                                                       |                                                                                                                                        |    |                                                          |                          |
|------------------------------|-----------------------------------------|-------------|------------------------------------------------------------------------------------------------------------------------------------------------------------------------------------------------------------------------------------------------------------------|-------------------------------------------------------------------------------------------------------------------------------------------|----------------------------------------------------------------------------------------------------------------------------------------------------------------------|----|----------------------------------------------------------------------------------------------------------------------------------------------------------------------------------------------------|---------------------------------------------------------------------------------------------------------------------------------------------------------------------------------------------------------------------------------------|----------------------------------------------------------------------------------------------------------------------------------------|----|----------------------------------------------------------|--------------------------|
| <b>Monika Rieger</b>         | SVLFG                                   | no          | no                                                                                                                                                                                                                                                               | no                                                                                                                                        | no                                                                                                                                                                   | no | Board member of the German Society for Occupational and Environmental Medicine (DGAUM), Medical Advisory Board for Occupational Diseases BMAS                                                      | Until 2009: occupational biological stress, occupational zoonoses, since 2009: occupational health care research, occupational musculoskeletal and psychomental stresses and strains                                                  | As a board member of DGAUM: participation in the programme design of training courses, design of training courses as head of institute | no | State of Baden-Württemberg/ University Hospital Tübingen | No conflicts of interest |
| <b>Bernhard R. Ruf</b>       | SLÄK                                    | RKI         | EKK                                                                                                                                                                                                                                                              | Textbook                                                                                                                                  | Terevance                                                                                                                                                            | no | DGI                                                                                                                                                                                                | Infectious diseases and tropical medicine                                                                                                                                                                                             | Infectious diseases and tropical medicine                                                                                              | no | Klinikum St. Georg gGmbH                                 | No conflicts of interest |
| <b>Rainer Schäfert (CH)</b>  | Occasional expert activities for courts | no          | Instructor at Heidelberg Institute for Psychotherapy, Network for Advanced Training in General Medicine Baden-Württemberg, instructor for patient forum for stomach and intestinal disorders at the German Society for Neurogastroenterology and motility (DGNM) | Textbook: Psychosomatik und Verhaltensmedizin, textbook: Uexküll Psychosomatische Medizin, textbook: Allgemeinmedizin Klimm, Peters-Klimm | Examining patients with high levels of somatic symptoms of distress in China, Chinese-German Symposium: "Multiple distressing somatic symptoms in China and Germany" | no | German Society of Psychosomatic Medicine and Medical Psychotherapy (DGPM)/ Psychosomatics and Psychotherapy, The German College of Psychosomatic Medicine (DKPM) /Psychosomatics and Psychotherapy | Somatoform disorders, functional gastrointestinal disorders, group therapy; psychosomatics in somatic medicine, initially assistant physician, then senior physician, later chief physician and clinical professor for psychosomatics | no                                                                                                                                     | no | University Hospital of Basel                             | No conflicts of interest |
| <b>Christel Schmedt</b>      | no                                      | no          | no                                                                                                                                                                                                                                                               | no                                                                                                                                        | no                                                                                                                                                                   | no | no                                                                                                                                                                                                 | no                                                                                                                                                                                                                                    | no                                                                                                                                     | no | German Federal Association for Tick-Borne Diseases (BZK) | No conflicts of interest |
| <b>Erich Schmutzhard (A)</b> | no                                      | Hypothermia | no                                                                                                                                                                                                                                                               | no                                                                                                                                        | PI: NOSTRA Study, steering comm: NEWTON Study                                                                                                                        | no | no                                                                                                                                                                                                 | no                                                                                                                                                                                                                                    | no                                                                                                                                     | no | Medical Univ. Innsbruck                                  | No conflicts of interest |



|                                  |    |    |                                                                                                     |                                                                                                          |      |    |                                                                                                                                                                                                                                                                                                                                                                               |                                                                                                                                                                                                        |                                     |    |                                                                                        |                          |
|----------------------------------|----|----|-----------------------------------------------------------------------------------------------------|----------------------------------------------------------------------------------------------------------|------|----|-------------------------------------------------------------------------------------------------------------------------------------------------------------------------------------------------------------------------------------------------------------------------------------------------------------------------------------------------------------------------------|--------------------------------------------------------------------------------------------------------------------------------------------------------------------------------------------------------|-------------------------------------|----|----------------------------------------------------------------------------------------|--------------------------|
| <b>Helmut Sitter (moderator)</b> | no | no | no                                                                                                  | no                                                                                                       | no   | no | no                                                                                                                                                                                                                                                                                                                                                                            | Methodology clinical studies, meta-analyses, guidelines                                                                                                                                                | no                                  | no | Phillips Universität Marburg                                                           | No conflicts of interest |
| <b>Klaus Stark</b>               | no | no | no                                                                                                  | no                                                                                                       | no   | no | no                                                                                                                                                                                                                                                                                                                                                                            | Infection epidemiology, zoonoses etc.                                                                                                                                                                  | no                                  | no | Robert Koch-Institut                                                                   | No conflicts of interest |
| <b>Mathias Sturzenegger (CH)</b> | no | no | Association of Swiss General Practitioners                                                          | no                                                                                                       | no   | no | Board member of the Swiss Headache Society, board member of the Swiss Parkinson Society, board member of the Annemarie Opprecht Foundation                                                                                                                                                                                                                                    | Cerebrovascular diseases, headaches; acute care ward University Clinic for Neurology                                                                                                                   | no                                  | no | University Clinic for Neurology, Inselspital, University of Bern                       | No conflicts of interest |
| <b>Jonas Tesarz</b>              | no | no | Working group EMDR in pain therapy, German Society for Manual Medicine/ Association for Muscle Pain | Practical manual: EMDR in der Schmerztherapie KlettCotta Verlag, chapter: Somatoforme Störungen Springer | BMBF | no | German Society of Psychosomatic Medicine and Medical Psychotherapy (DGPM)/ Psychosomatics and Psychotherapy, German Society for Manual Medicine/ Manual Medicine and Chirotherapy, Association for Muscle Pain/ Scientific Aspects of Muscle Pain, Professional Association for Users of the Psychotherapeutic Method, Eye Movement Desensitization and Reprocessing (EMDRIA) | Chronic pain and functional physical complaints, physical activity and pain, psychosocial factors and chronic back pain, EMDR in pain therapy; internal medicine, psychosomatics, consultation service | Working group: EMDR in pain therapy | no | Clinic for General Internal and Psychosomatic Medicine/ Heidelberg University Hospital | No conflicts of interest |

|                         |    |                                                                                    |                                    |    |                                         |                                                                           |                                                                                                       |                                                                                 |    |    |                                                     |                          |
|-------------------------|----|------------------------------------------------------------------------------------|------------------------------------|----|-----------------------------------------|---------------------------------------------------------------------------|-------------------------------------------------------------------------------------------------------|---------------------------------------------------------------------------------|----|----|-----------------------------------------------------|--------------------------|
| <b>Stephan Thureau</b>  | no | European Medicines Agency (EMA), Allergan, Panoptes GmbH Wien, Santen Inc., AbbVie | Allergan, AbbVie, Santen, Novartis | no | Santen Inc., AbbVie, Panoptes GmbH Wien | Patent: systemic therapeutic agent for autoimmune, non-infectious uveitis | Uveitis Department of the German Ophthalmological Society, German Uveitis Working Group Patient Group | Autoimmune diseases of the eye                                                  | no | no | University Eye Hospital of the University of Munich | No conflicts of interest |
| <b>Reinhard Wallich</b> | no | no                                                                                 | no                                 | no | no                                      | no                                                                        | Member of the German Society for Immunology                                                           | Escape mechanisms of Borrelia, development of vaccines against Lyme borreliosis | no | no | Retired                                             | No conflicts of interest |
| <b>Hendrik Wilking</b>  | no | European Center for Disease Control                                                | Charite Berlin                     | no | no                                      | no                                                                        | no                                                                                                    | Epidemiological studies on the incidence of infections in the German population | no | no | Robert Koch Institute                               | No conflicts of interest |

\* to an authorised representative of a company in the health sector, as a partner or first-degree relative
